# Supplementary material for: Particle size effect in the mechanically assisted synthesis of β-cyclodextrin mesitylene sulfonate
Source: publisher site journal article supplement (doi:10.3762/bjoc.16.211), 2020-10-22
Supplement: Additional file 1 [file 1860-5397-16-211-S1.pdf]

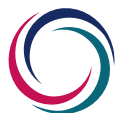

## Supporting Information

for

### Particle size effect in the mechanically assisted synthesis of $\beta$ -cyclodextrin mesitylene sulfonate

Stéphane Menuel, Sébastien Saitzek, Eric Monflier and Frédéric Hapiot

*Beilstein J. Org. Chem.* **2020**, *16*, 2598–2606. doi:10.3762/bjoc.16.211

### Determination of $\alpha$ , solid-state kinetic models and general procedure for the preparation of the investigated compound

## Table of contents

|                             | Page |
|-----------------------------|------|
| Determination of $\alpha$   | S2   |
| Solid-state kinetics models | S3   |
| NMR                         | S5   |
| MALDI                       | S8   |

## Determination of $\alpha$

$\alpha$  is defined by:  $\alpha = \frac{nt}{n_{\infty}}$  with  $n_t$  the conversion at time  $t$ , and  $n_{\infty}$  the final conversion.

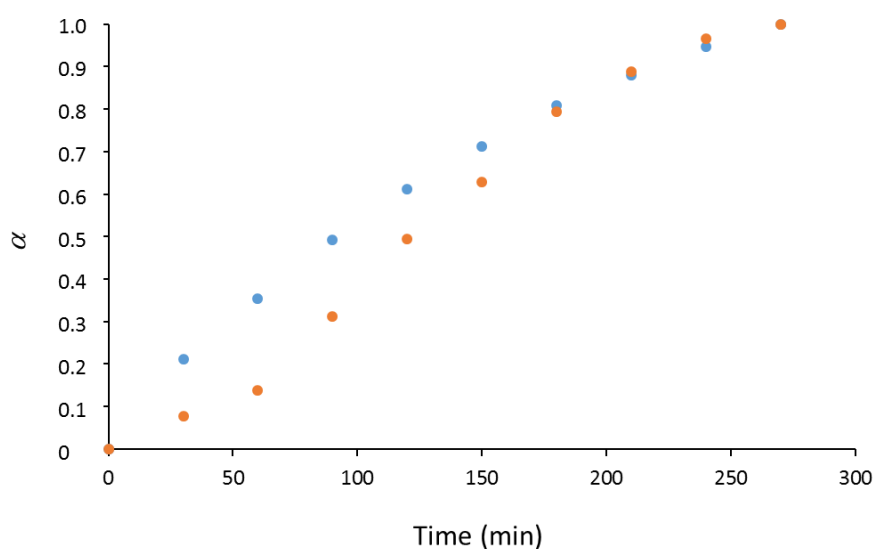

**Figure S1:** Compared values of  $\alpha$  against time in the synthesis of  $\beta$ -CDMTs without priorly ground  $\beta$ -CD (●) and with ground  $\beta$ -CD ( $\approx 235$  nm) (●).

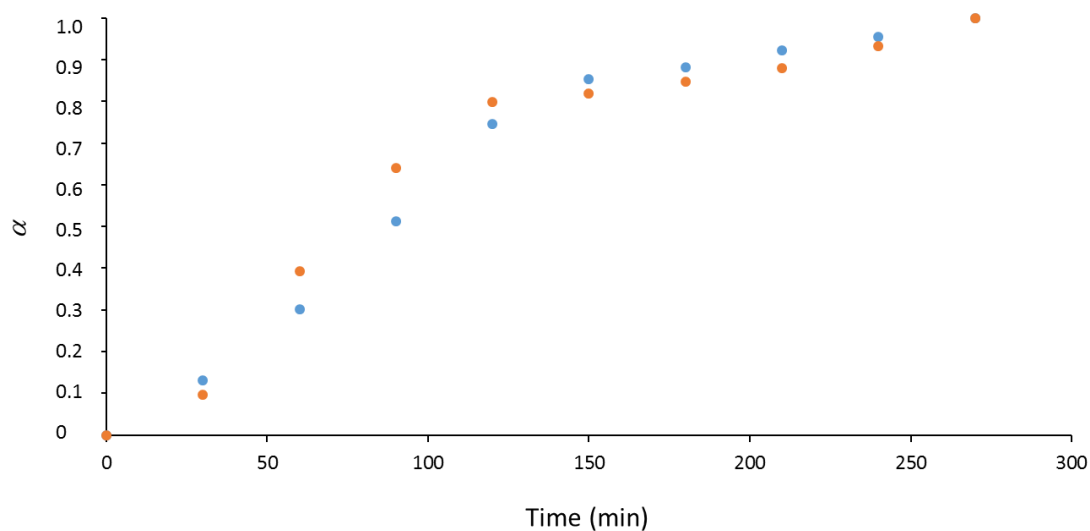

**Figure S2:** Compared values of  $\alpha$  against time in the synthesis of  $\beta$ -CDMTs in the presence of KOH (1 equiv with respect to  $\beta$ -CD) without priorly ground  $\beta$ -CD (●) and with ground  $\beta$ -CD ( $\approx 235$  nm) (●).

## Solid-state kinetics models

**Table S1:** Solid-state rate and integral expressions for different reaction models.<sup>1</sup>

| Model                          | Abbreviation | Integral form: $g(\alpha) = k.t$   |
|--------------------------------|--------------|------------------------------------|
| nucleation models              |              |                                    |
| power law                      | P2           | $\alpha^{1/2}$                     |
|                                | P3           | $\alpha^{1/3}$                     |
|                                | P4           | $\alpha^{1/4}$                     |
| Avrami-Erofeev                 | A2           | $[-\ln(1-\alpha)]^{1/2}$           |
|                                | A3           | $[-\ln(1-\alpha)]^{1/3}$           |
|                                | A4           | $[-\ln(1-\alpha)]^{1/4}$           |
| Prout-Tompkins                 | B1           | $\ln[\alpha/(1-\alpha)] + c^a$     |
| geometrical contraction models |              |                                    |
| contracting area               | R2           | $1-(1-\alpha)^{1/2}$               |
| contracting volume             | R3           | $1-(1-\alpha)^{1/3}$               |
| diffusion models               |              |                                    |
| 1-D diffusion                  | D1           | $\alpha^2$                         |
| 2-D diffusion                  | D2           | $((1-\alpha)\ln(1-\alpha))+\alpha$ |
| 3-D diffusion-Jander           | D3           | $(1-(1-\alpha)^{1/3})^2$           |
| Ginstling-Brounshtein          | D4           | $1-(2/3)\alpha-(1-\alpha)^{2/3}$   |
| reaction-order models          |              |                                    |
| zero-order                     | F0/R1        | $\alpha$                           |
| first-order                    | F1           | $-\ln(1-\alpha)$                   |
| second-order                   | F2           | $[1/(1-\alpha)]-1$                 |
| third-order                    | F3           | $(1/2)[(1-\alpha)^{-2}-1]$         |

<sup>a</sup> Constant of integration.

**Table S2:** Solid-state kinetics model for the synthesis of  $\beta$ -CDMTs without base.

|  |                             | Nucleation models |         |         |         |         |         |         | Geometrical contraction |         | diffusion models |         |         |         | reaction-order model |         |         |         |
|--|-----------------------------|-------------------|---------|---------|---------|---------|---------|---------|-------------------------|---------|------------------|---------|---------|---------|----------------------|---------|---------|---------|
|  |                             | P2                | P3      | P4      | A2      | A3      | A4      | B1      | R2                      | R3      | D1               | D2      | D3      | D4      | F0/R1                | F1      | F2      | F3      |
|  | $\beta$ CD without grinding | 0.80419           | 0.67592 | 0.59033 | 0.96990 | 0.88020 | 0.78820 | 0.99316 | 0.98220                 | 0.90329 | 0.99126          | 0.95640 | 0.64365 | 0.89243 | 0.96459              | 0.94849 | 0.66083 | 0.44721 |
|  | ground $\beta$ CD           | 0.92454           | 0.83787 | 0.75577 | 0.99020 | 0.97522 | 0.92078 | 0.99338 | 0.96772                 | 0.90225 | 0.94711          | 0.87957 | 0.65903 | 0.86061 | 0.97890              | 0.86959 | 0.52725 | 0.36262 |

**Table S3:** Solid-state kinetics model for the synthesis of  $\beta$ -CDMTs in the presence of KOH (1 equiv with respect to  $\beta$ -CD).

|  |                             | Nucleation models |         |         |         |         |         |         | Geometrical contraction |         | diffusion models |         |         |         | reaction-order model |         |         |         |
|--|-----------------------------|-------------------|---------|---------|---------|---------|---------|---------|-------------------------|---------|------------------|---------|---------|---------|----------------------|---------|---------|---------|
|  |                             | P2                | P3      | P4      | A2      | A3      | A4      | B1      | R2                      | R3      | D1               | D2      | D3      | D4      | F0/R1                | F1      | F2      | F3      |
|  | $\beta$ CD without grinding | 0.79487           | 0.69665 | 0.62128 | 0.96930 | 0.90166 | 0.82687 | 0.96297 | 0.97813                 | 0.94743 | 0.94924          | 0.95984 | 0.73804 | 0.95309 | 0.90287              | 0.98046 | 0.79768 | 0.56297 |
|  | ground $\beta$ CD           | 0.73696           | 0.65228 | 0.58881 | 0.90662 | 0.82850 | 0.75818 | 0.85448 | 0.94499                 | 0.89982 | 0.94267          | 0.95785 | 0.65568 | 0.92113 | 0.85484              | 0.97182 | 0.86150 | 0.61967 |

## NMR

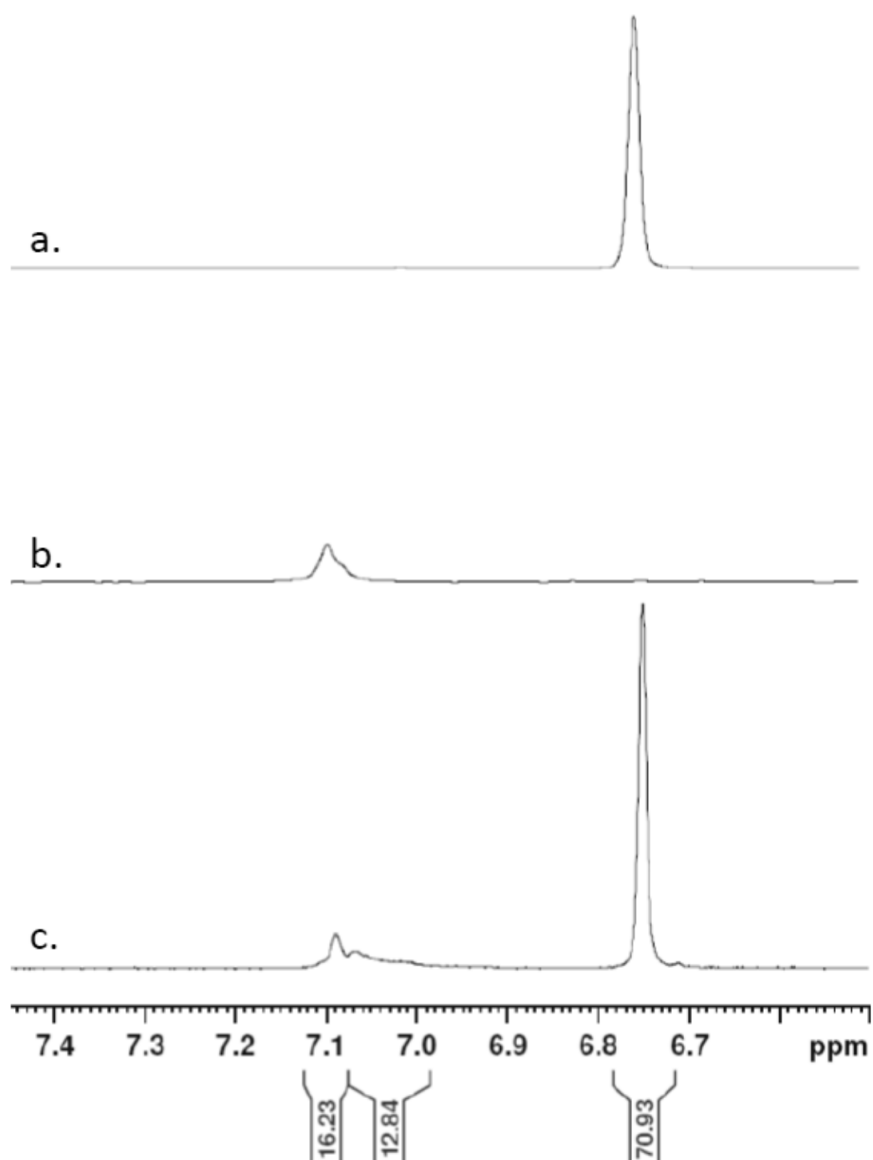

**Figure S3:**  $^1\text{H}$  NMR partial spectrum ( $\text{DMSO-}d_6$ ,  $25^\circ\text{C}$ ) of a.  $\text{MtsCl}$ ; b.  $\beta\text{-CDMTs}$ ; c. crude reaction mixture.

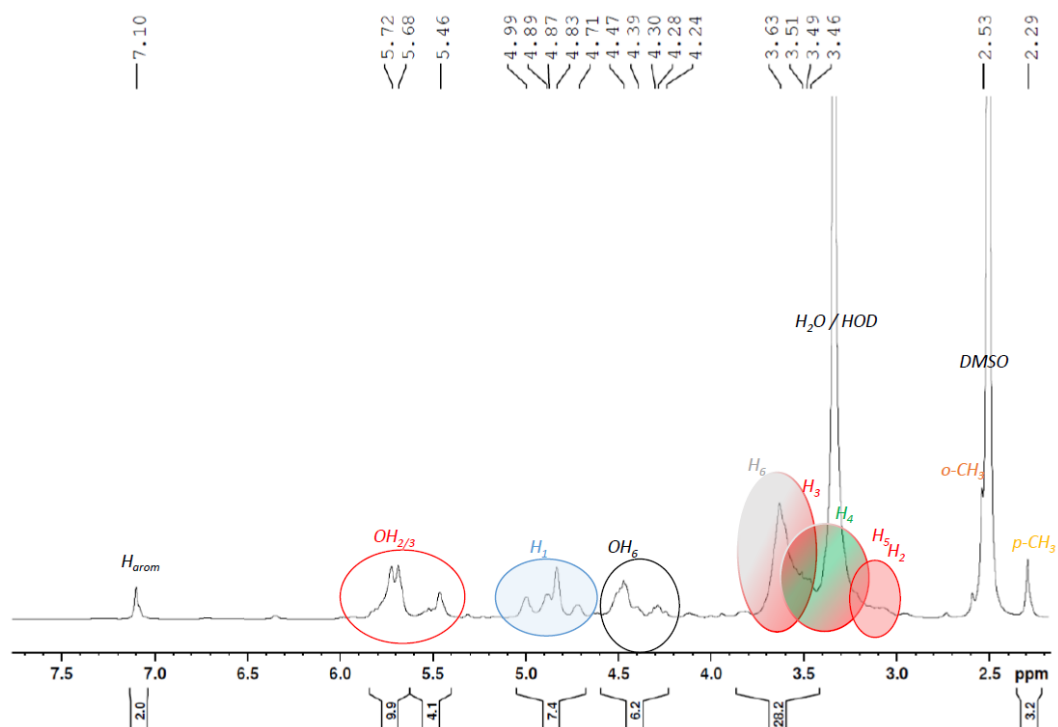

**Figure S4:**  $^1\text{H}$  NMR of mono-6-*O*-(mesitylenesulfonyl)- $\beta$ -CD (DMSO- $d_6$ , 25 °C).

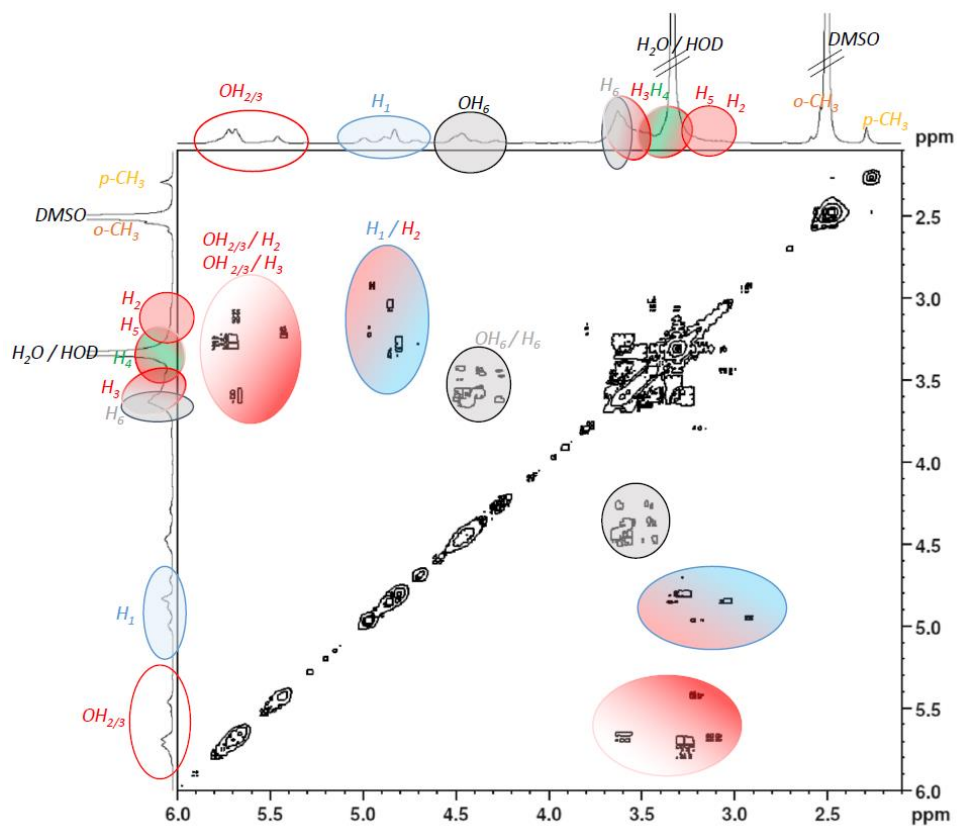

**Figure S5:** COSY spectrum of mono-6-*O*-(mesitylenesulfonyl)- $\beta$ -CD (DMSO- $d_6$ , 25 °C).

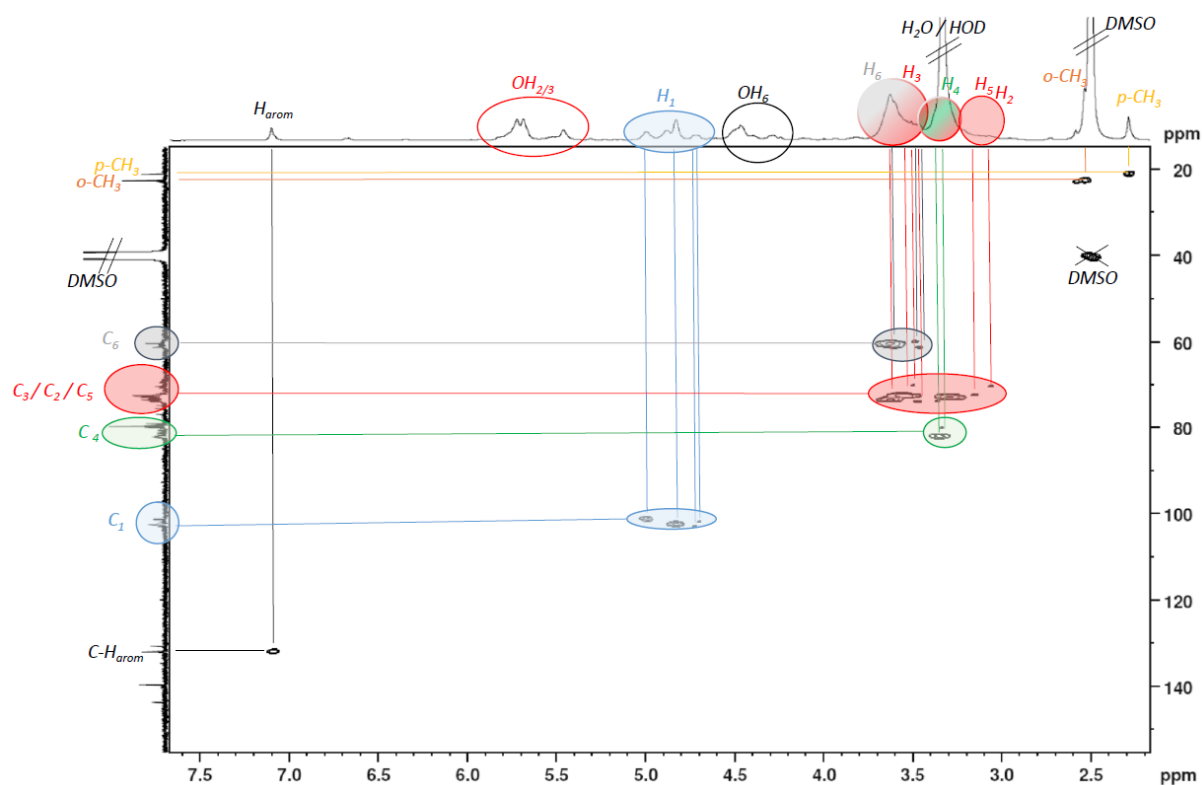

**Figure S6:** HSQC spectrum of mono-6-*O*-(mesitylenesulfonyl)- $\beta$ -CD (DMSO- $d_6$ , 25 °C).

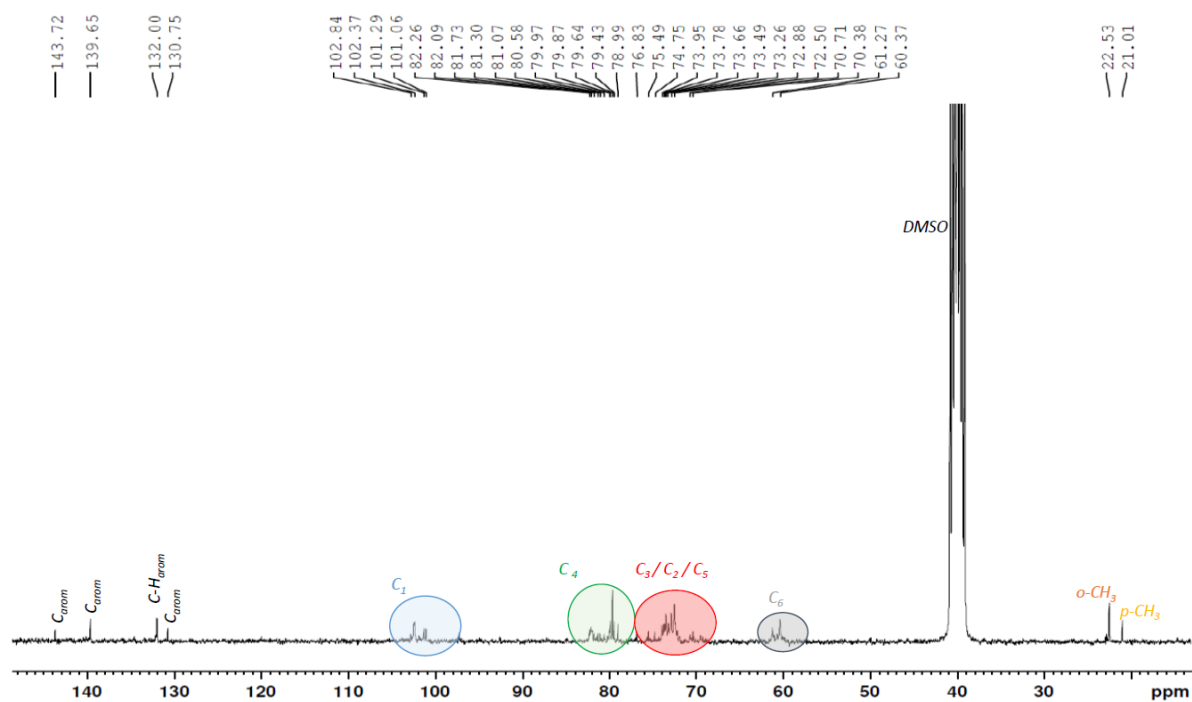

**Figure S7:**  $^{13}\text{C}$  spectrum of mono-6-*O*-(mesitylenesulfonyl)- $\beta$ -CD (DMSO- $d_6$ , 25 °C).



## MALDI

The presence of poly-substituted  $\beta$ -CDMs was confirmed by MALDI. However, the MALDI analysis should be used with caution regarding the relative quantities of products as the intensity of the peaks is not quantitative.

Example of a MALDI spectrum showing the presence of poly-substituted  $\beta$ -CDMs :

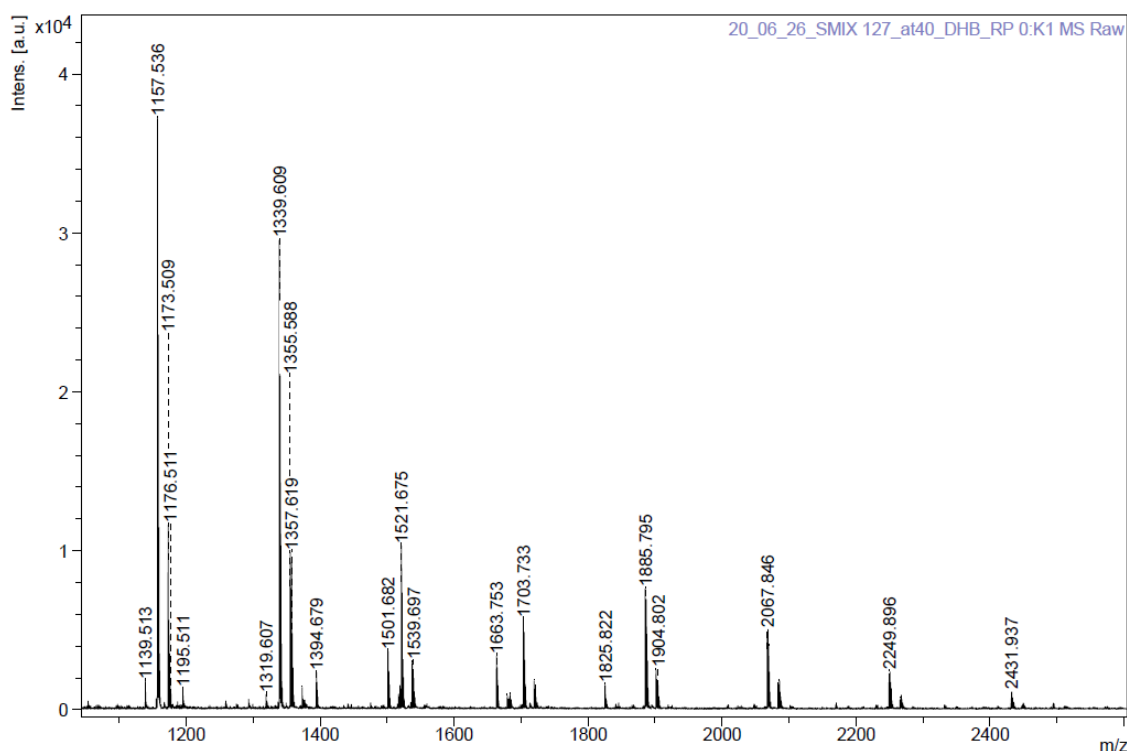

**Figure S8:** MALDI spectrum showing the presence of polysubstituted  $\beta$ -CDMs (before purification).

Considering an unmodified  $\beta$ -CD consisting of 7 glucose units, we can define the mono-modification of a glucose unit as being either monoOMst or mono(3,6-anhydro). Thus, unmodified glucopyranose units of  $\beta$ -CD are denoted "g", while modified glucopyranose units are either denoted "m" (OMst), or "a" (3,6-anhydro). This notation g-m-a is used for the description of MALDI spectra with "g-m-a Na" for sodium adducts and "g-m-a K" for potassium adducts. In agreement with the expectation of the DHB matrix, we observe, for each g-m-a assignment, the sodium adduct in an ultra-predominant manner possibly associated with the potassium adduct when the intensity of the signal allows. We observed the following adducts: 7-0-0 Na (1157.5 D) and 7-0-0 K (1173.5 D) for the unmodified  $\beta$ -CD, 6-1-0 Na (1339.6 D), 6-1-0 K (1355.6 D), 5-2-0 Na (1521.7 D), 5-2-0 K (1539.7 D), 4-3-0 Na (1703.7 D), 4-3-0 K (1719.7 D), 3-4-0 Na (1885.8 D), 3-4-0 K (1904.8 D), 2-5-0 Na (2067.8 D), 2-5-0 K (2083.8 D), 1-6-0 Na (2249.9 D), 1-6-0 K (2266.9 D) and 0-7-0 Na (2431.9 D). The 6-0-1 Na (1139.5 D) combination

assigned to the sodium adduct of mono (3-6-anhydro)- $\beta$ -CD is also observed at a very low intensity.

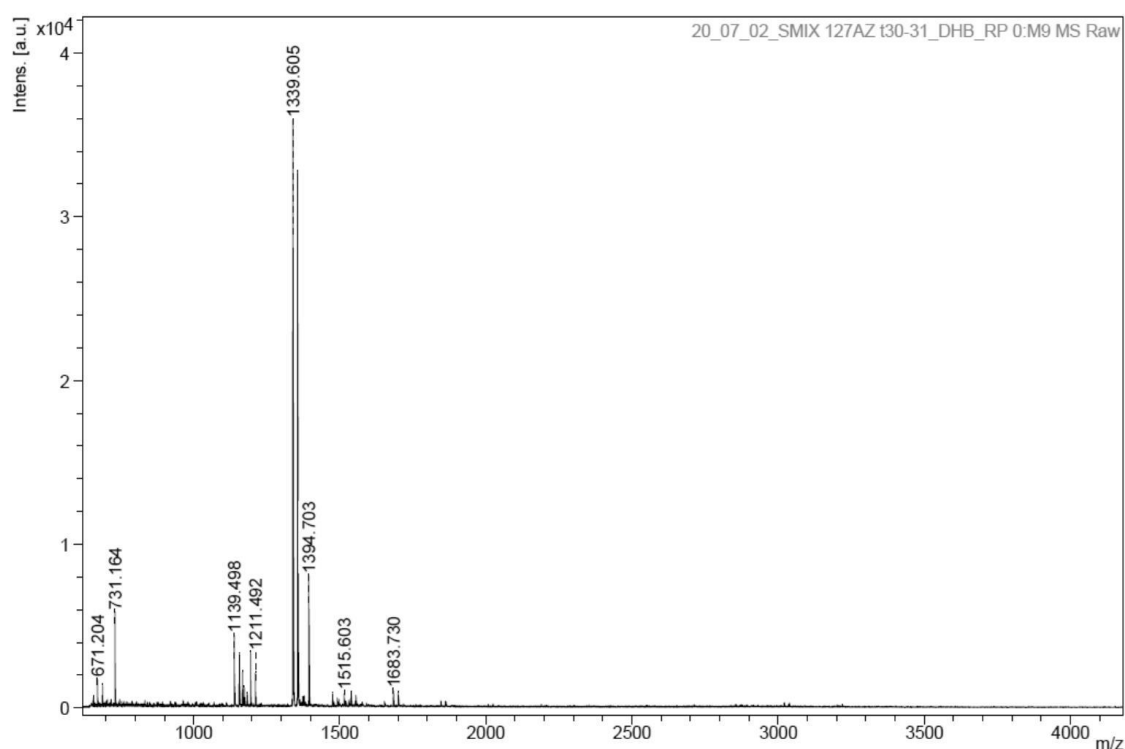

**Figure S9:** MALDI spectrum of  $\beta$ -CDMTs (after purification).

<sup>1</sup> A. Khawam, D. R. Flanagan, *J. Phys. Chem. B* **2006**, *110*, 17315-17328.
